# Supplementary material for: FOXO3/Rab7-Mediated Lipophagy and Its Role in Zn-Induced Lipid Metabolism in Yellow Catfish (Pelteobagrus fulvidraco)
Source: MDPI journal article supplement (doi:10.3390/genes15030334), 2024-03-04
Supplement: s1 [file s1]

Table S1. Primers used for Rab7 promoter cloning

| Gene | Forward primer (5'-3') | Reverse primer (5'-3') | Step   |
|------|------------------------|------------------------|--------|
| Rab7 | ACGATGGACTCCAGAGCGG    | GATCTACTGTATGAACT      | hiTAIL |
|      | CCGCVVNVNNNCCAA        | ATAACTC                | -PCR1  |
|      | ACGATGGACTCCAGAG       | ACAGTTTAACTGCCAGA      | hiTAIL |
|      |                        | AGTATCTGCT             | -PCR2  |
|      | ACGATGGACTCCAGAG       | CTTCAAGAGCAGCTTAC      | hiTAIL |
|      |                        | TTTCACAG               | -PCR3  |

Table S2. Primers used for 5'-deletion plasmids construction

| Gene | Primers            | Forward primer (5'-3')                                  | Reverse primer (5'-3')                               |
|------|--------------------|---------------------------------------------------------|------------------------------------------------------|
| Rab7 | pGl3-<br>-382/+67  | ctatcgataggtaccgagctcTTAAA<br>GAACTTTTAAACATATCA<br>AC  | cagtaccggaatgccaaagcttTAACTC<br>CCGTCTCTCACTTCCTGTTC |
|      | pGl3-<br>-795/+67  | ctatcgataggtaccgagctcACCCT<br>GTCACCCTAACCCCTGTAA<br>CC | cagtaccggaatgccaaagcttTAACTC<br>CCGTCTCTCACTTCCTGTTC |
|      | pGl3-<br>-1206/+67 | ctatcgataggtaccgagctcCTAAC<br>CCTGTAACCCTGTAACCC<br>TG  | cagtaccggaatgccaaagcttTAACTC<br>CCGTCTCTCACTTCCTGTTC |
|      | pGl3-<br>-1600/+67 | ctatcgataggtaccgagctcAACCT<br>CTCTAGGGGGAACCCCT<br>AA   | cagtaccggaatgccaaagcttTAACTC<br>CCGTCTCTCACTTCCTGTTC |

Table S3. The reference binding site sequences

| Name               | Binding site sequences |
|--------------------|------------------------|
| FOXO3              | GTAAACA                |
| FXR                | AGGTCA                 |
| HNF4 $\alpha$      | CAAAGTCCA              |
| KLF4               | AAAGGAAGG              |
| PPAR $\alpha$ /RXR | GGNAAAGGT              |
| SREBP2             | TCACGTCA               |
| STAT3              | TTCTNGGAA              |
| TATA-box           | TATAAA                 |
| TFEB               | CACGTGAC               |
| NRF2               | TGACTCGCA              |

Table S4. Primers used for site-mutation analysis

| Gene | Primers     | Forward primer (5'-3')   | Reverse primer (5'-3') |
|------|-------------|--------------------------|------------------------|
| Rab7 | Mut-FOXO3-1 | CTTAcaccgatggaatAAAACA   | TTattccatcggtgTAAGAATA |
|      |             | AATACTTACTTATTTATATT     | GTGTTGTGTGTTCCATGT     |
|      |             | TCAATTGC                 | ATG                    |
|      | Mut-FOXO3-2 | GTTATTtcagcgtcatgaTATTT  | tcatgacgctgaAATAACAAAA |
|      |             | CAAAAATCCTTGTGATAT       | CGAATAACAAAATAAAC      |
|      |             | ATTCAGT                  | AA                     |
|      | Mut-FOXO3-3 | TTTgatcctgacgaaGTTATTTCG | AACttcgtcaggatcAAAATAA |
|      |             | TTTTGTTATTTATTATTTA      | CAAAAATAAATAAATAA      |
|      |             | CTATATTTC                | CAAAACAA               |

Table S5. Primers used for Q-PCR analysis

| Gene           | Forward primer (5'-3')         | Reverse primer (5'-3')          |
|----------------|--------------------------------|---------------------------------|
| <i>6pgd</i>    | CTGCTGCTGGACTCCTTCTT           | GTTGTGTCTGTAACCGTCGTAA          |
| <i>acadm</i>   | GCAGAAGGAGTTCCAGGAGGTG<br>TC   | CAGCAATAATGACCGGCATTTGT<br>C    |
| <i>acca</i>    | ACTTCTGCTGTGGTTGTCCTAT         | GCATCCATCGTGGGTCATA             |
| <i>atg1</i>    | ATCTGGTGAAGGTGCTGAAGT          | CTCTGACTGTGGCAGGTTGT            |
| <i>atg3</i>    | GGAAGGCTGAGGCAAGCGGAG<br>A     | TGGGTGGTTTTCAATGGTGACTG<br>TTTT |
| <i>atg4</i>    | ATGGAGGCAGTTTTAGCCAAGT<br>AT   | TGTATGTAAACCACAGCCGTGAA         |
| <i>atg5</i>    | CAGAACCGTTTTATCTTCTCCTA<br>CCG | CGTCTACATCTTCAGCTTTCACG<br>ACTT |
| <i>atgl</i>    | ATCTGGTGAAGGTGCTGAAGT          | CTCTGACTGTGGCAGGTTGT            |
| <i>β-actin</i> | GTGCGTGACATCAAGGAGAAG          | CGAGGAAGGATGGCTGGAA             |
| <i>b2m</i>     | GCTGATCTGCCATGTGAGTG           | TGTCTGACACTGCAGCTGTA            |
| <i>beclin1</i> | CTCAACTGGACCGCCTGAAGAA         | CACTCCACAGGAACGCTGGGTA          |
| <i>cpt1α</i>   | CGCTCCTGCTCCAATGAGA            | GAGACCACATAGAGGCAGAAGA          |
| <i>elfa</i>    | GTCTGGAGATGCTGCCATTG           | AGCCTTCTTCTCAACGCTCT            |
| <i>fas</i>     | CATCATCACTGGAGGTCTTGGA         | TACGAATGCCTGATCTGGAAGT          |
| <i>foxo3</i>   | CCCGTGTTTACCTTCAGCTG           | TCAATGGGTCAGACTGGGTC            |
| <i>g6pd</i>    | GAGAAGCCTGCCTCAACCA            | GGATCGTCCAAGTAGCCAAGT           |
| <i>gapdh</i>   | AAAGTCATCCCCGAGCTCAA           | CTTCAGACGCAGCCTTCATC            |
| <i>hprt</i>    | ATGCTTCTGACCTGGAACGT           | TTGCGGTTTCAGTGCTTTGAT           |

|             |                                |                             |
|-------------|--------------------------------|-----------------------------|
| <i>hsl</i>  | ACCATTGCTCCACCGTCTG            | CGTCTCACTATCCTGTCCTTCA      |
| <i>lamp</i> | CAGCAACAGCAGTAGTGGGA           | AGCTCAGTGTAAGGTTGGCC        |
| <i>lc3b</i> | CCTGACCACGTCAACATGAGCG<br>AACT | GGAAATGGCGGCAGACACGGAG<br>A |
| <i>rab7</i> | AAGCTTTCCAGACCATCGCA           | AGAGAGGGTGGAGGGTGATC        |
| <i>rpl7</i> | GCGCCAGATCTTCAATGGAG           | CTCATTCTGCCATGACCACG        |
| <i>tbp</i>  | AGTCCCATGATGCCCTATGG           | GCAACAGCTTGGGAATGGAA        |
| <i>tfeb</i> | ACCAGCGACCTCCTCCTAAT           | AGCTCAAATCTCCCAGGCAC        |
| <i>tuba</i> | CACTTCCCTCTTGCCACCTA           | ACGGTACAGGAGACAACAGG        |

---
